# Supplementary material for: Efficacy of Tecovirimat and Cidofovir Against MPXV-Induced Pneumonia, Skin Lesion, and Arthritis in the High-Risk Population-Relevant SCID Mouse Model
Source: Research Square preprint supplement (doi:10.21203/rs.3.rs-6483910/v1), 2025-04-23
Supplement: Supplementary file 1 [file 65e942dfaff5617dfa0889e9.docx]

| **Supplementary Table 1. Pathologic Scoring of SCID Lung Tissue.** | |
| --- | --- |
| **Category** | **Score = Criteria** |
| Inflammatory Cell Infiltration | 0 = None; 1 = Mild; 2 = Moderate; 3 = Sever |
| Alveolar Wall Thickening | 0 = None; 1 = Mild; 2 = Moderate; 3 = Sever |
| Alveolar Atrophy and Collapse | 0 = None; 1 = Mild; 2 = Moderate; 3 = Sever |
| Hemorrhage | 0 = None; 1 = Mild; 2 = Moderate; 3 = Sever |
| Fibrosis | 0 = None; 1 = Mild; 2 = Moderate; 3 = Sever |
| Tissue Necrosis | 0 = None; 1 = Mild; 2 = Moderate; 3 = Sever |

| **Supplementary Table 2. Pathologic Scoring of Skin Tissue.** | |
| --- | --- |
| **Category** | **Score = Criteria** |
| Fibrous Tissue Hyperplasia | 0 = None; 1 = Mild; 2 = Moderate; 3 = Sever |
| Inflammatory Cell Infiltration | 0 = None; 1 = Mild; 2 = Moderate; 3 = Sever |
| Cell Necrosis | 0 = None; 1 = Mild; 2 = Moderate; 3 = Sever |
| Epidermal acanthosis | 0 = None; 1 = Mild; 2 = Moderate; 3 = Sever |
| Ballooning degeneration of keratinocytes | 0 = None; 1 = Mild; 2 = Moderate; 3 = Sever |
| Scab | 0 = None; 1 = Mild; 2 = Moderate; 3 = Sever |

| **Supplementary Table 3. Pathologic Scoring of SCID Ankle Joint.** | |
| --- | --- |
| **Category** | **Score = Criteria** |
| Fibrous Tissue Hyperplasia | 0 = None; 1 = Mild; 2 = Moderate; 3 = Sever |
| Inflammatory Cell Infiltration | 0 = None; 1 = Mild; 2 = Moderate; 3 = Sever |
| Cell Necrosis | 0 = None; 1 = Mild; 2 = Moderate; 3 = Sever |
| Articular Cartilage Injury | 0 = None; 1 = Mild; 2 = Moderate; 3 = Sever |
| Pannus | 0 = None; 1 = Mild; 2 = Moderate; 3 = Sever |

****
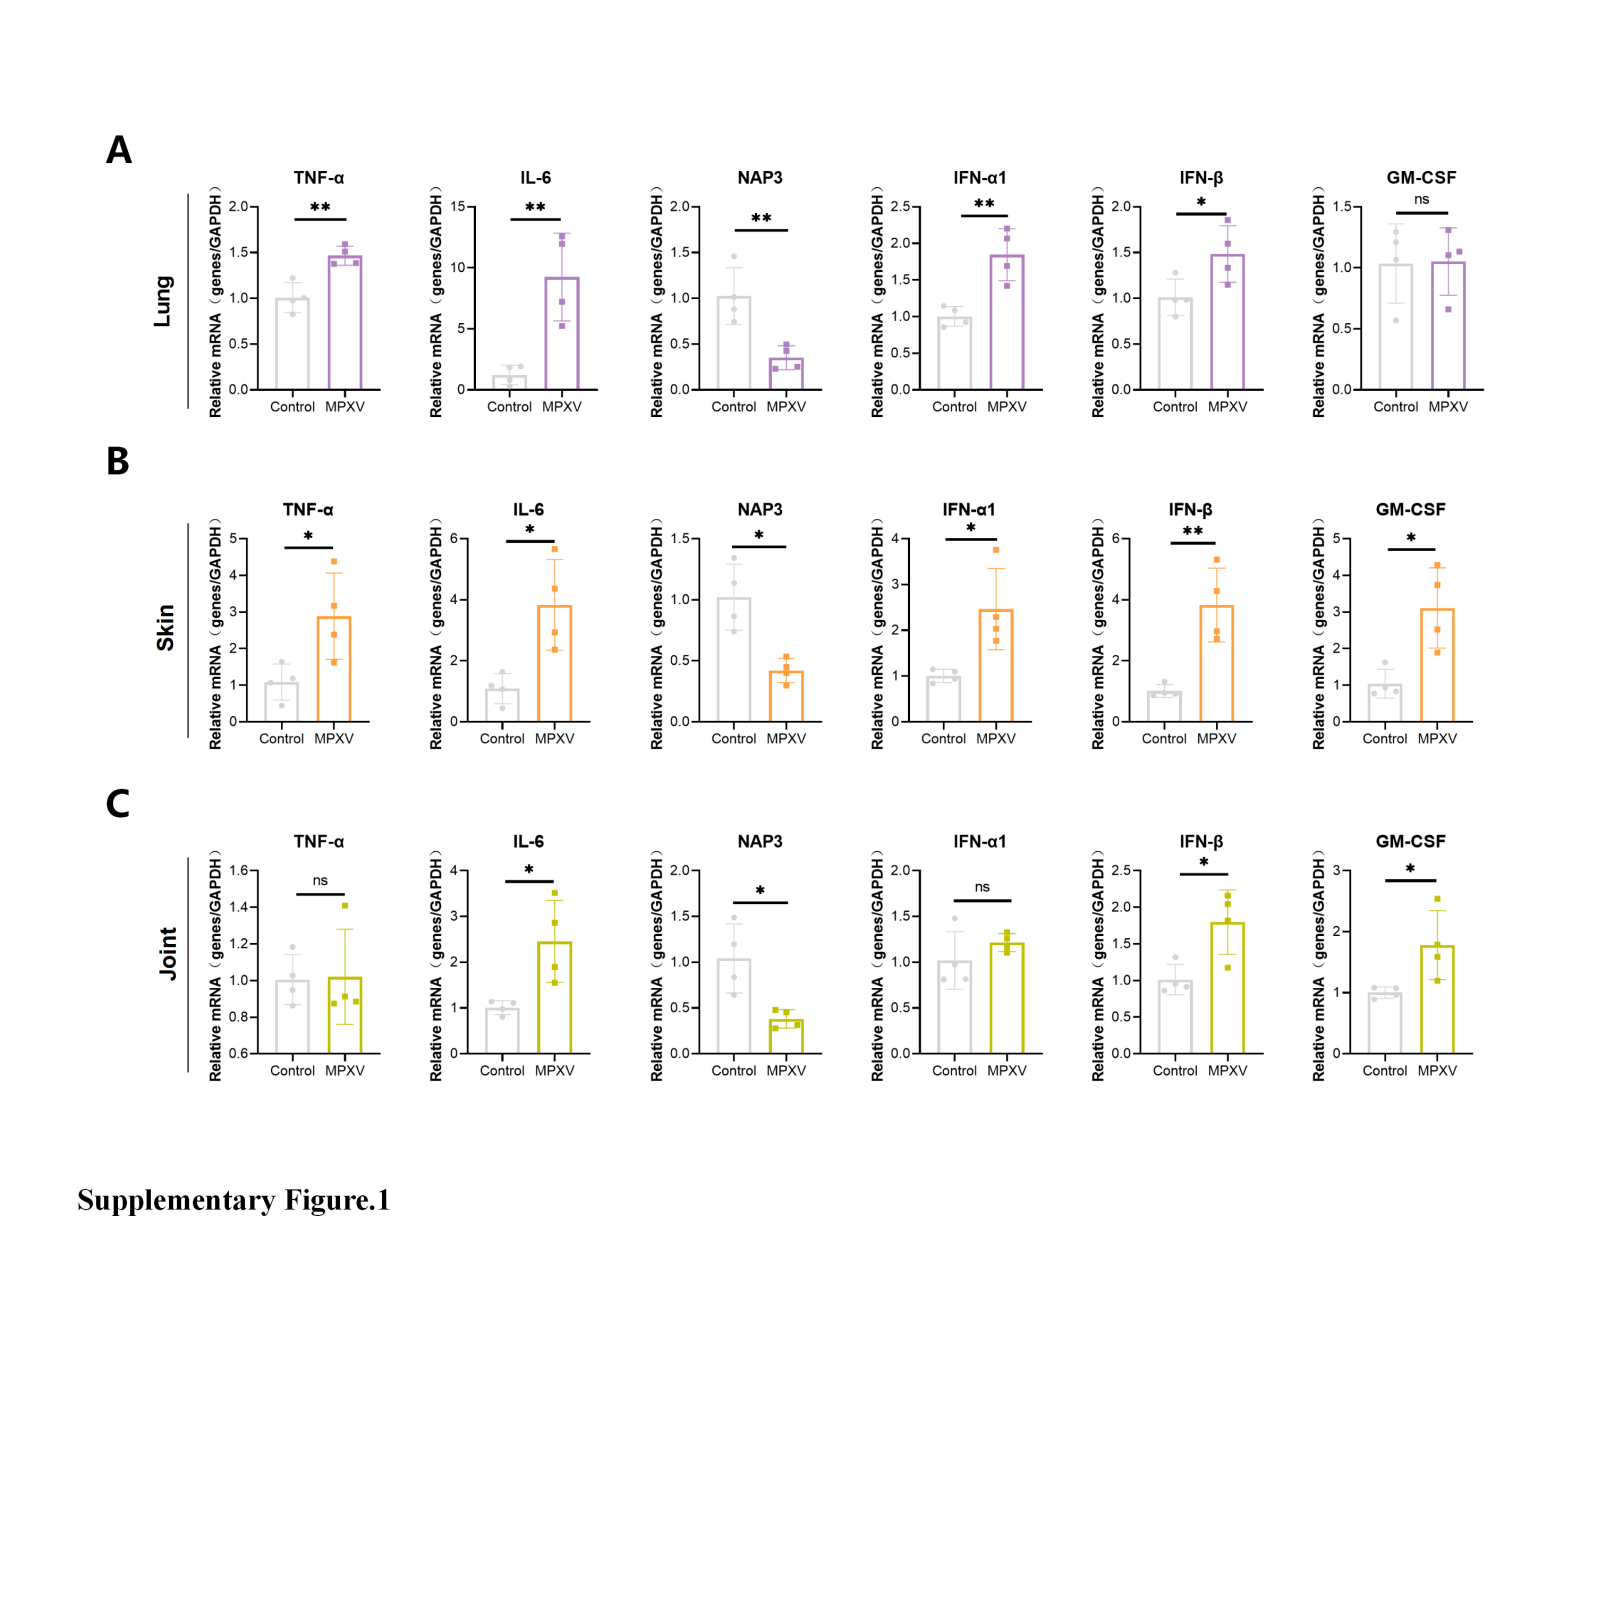
****

****Supplementary Figure 1.** Cytokine Detection in SCID Mouse Tissues.**
**At 28 dpi, the levels of TNF-α, IL-6, NAP3, IFN-α1, IFN-β, and GM-CSF were measured by RT-qPCR in the (A) lung of intranasally infected SCID mice, (B) the skin of intradermally infected SCID mice, and (C) the ankle joint of subcutaneously infected SCID mice. Error bars represent mean ± standard error of the mean (SEM).** Statistical differences between groups were determined by *t*-tests. Statistical significance levels are indicated as follows: *ns*, *P* > 0.05; **P* ≤ 0.05; ***P* ≤ 0.01.


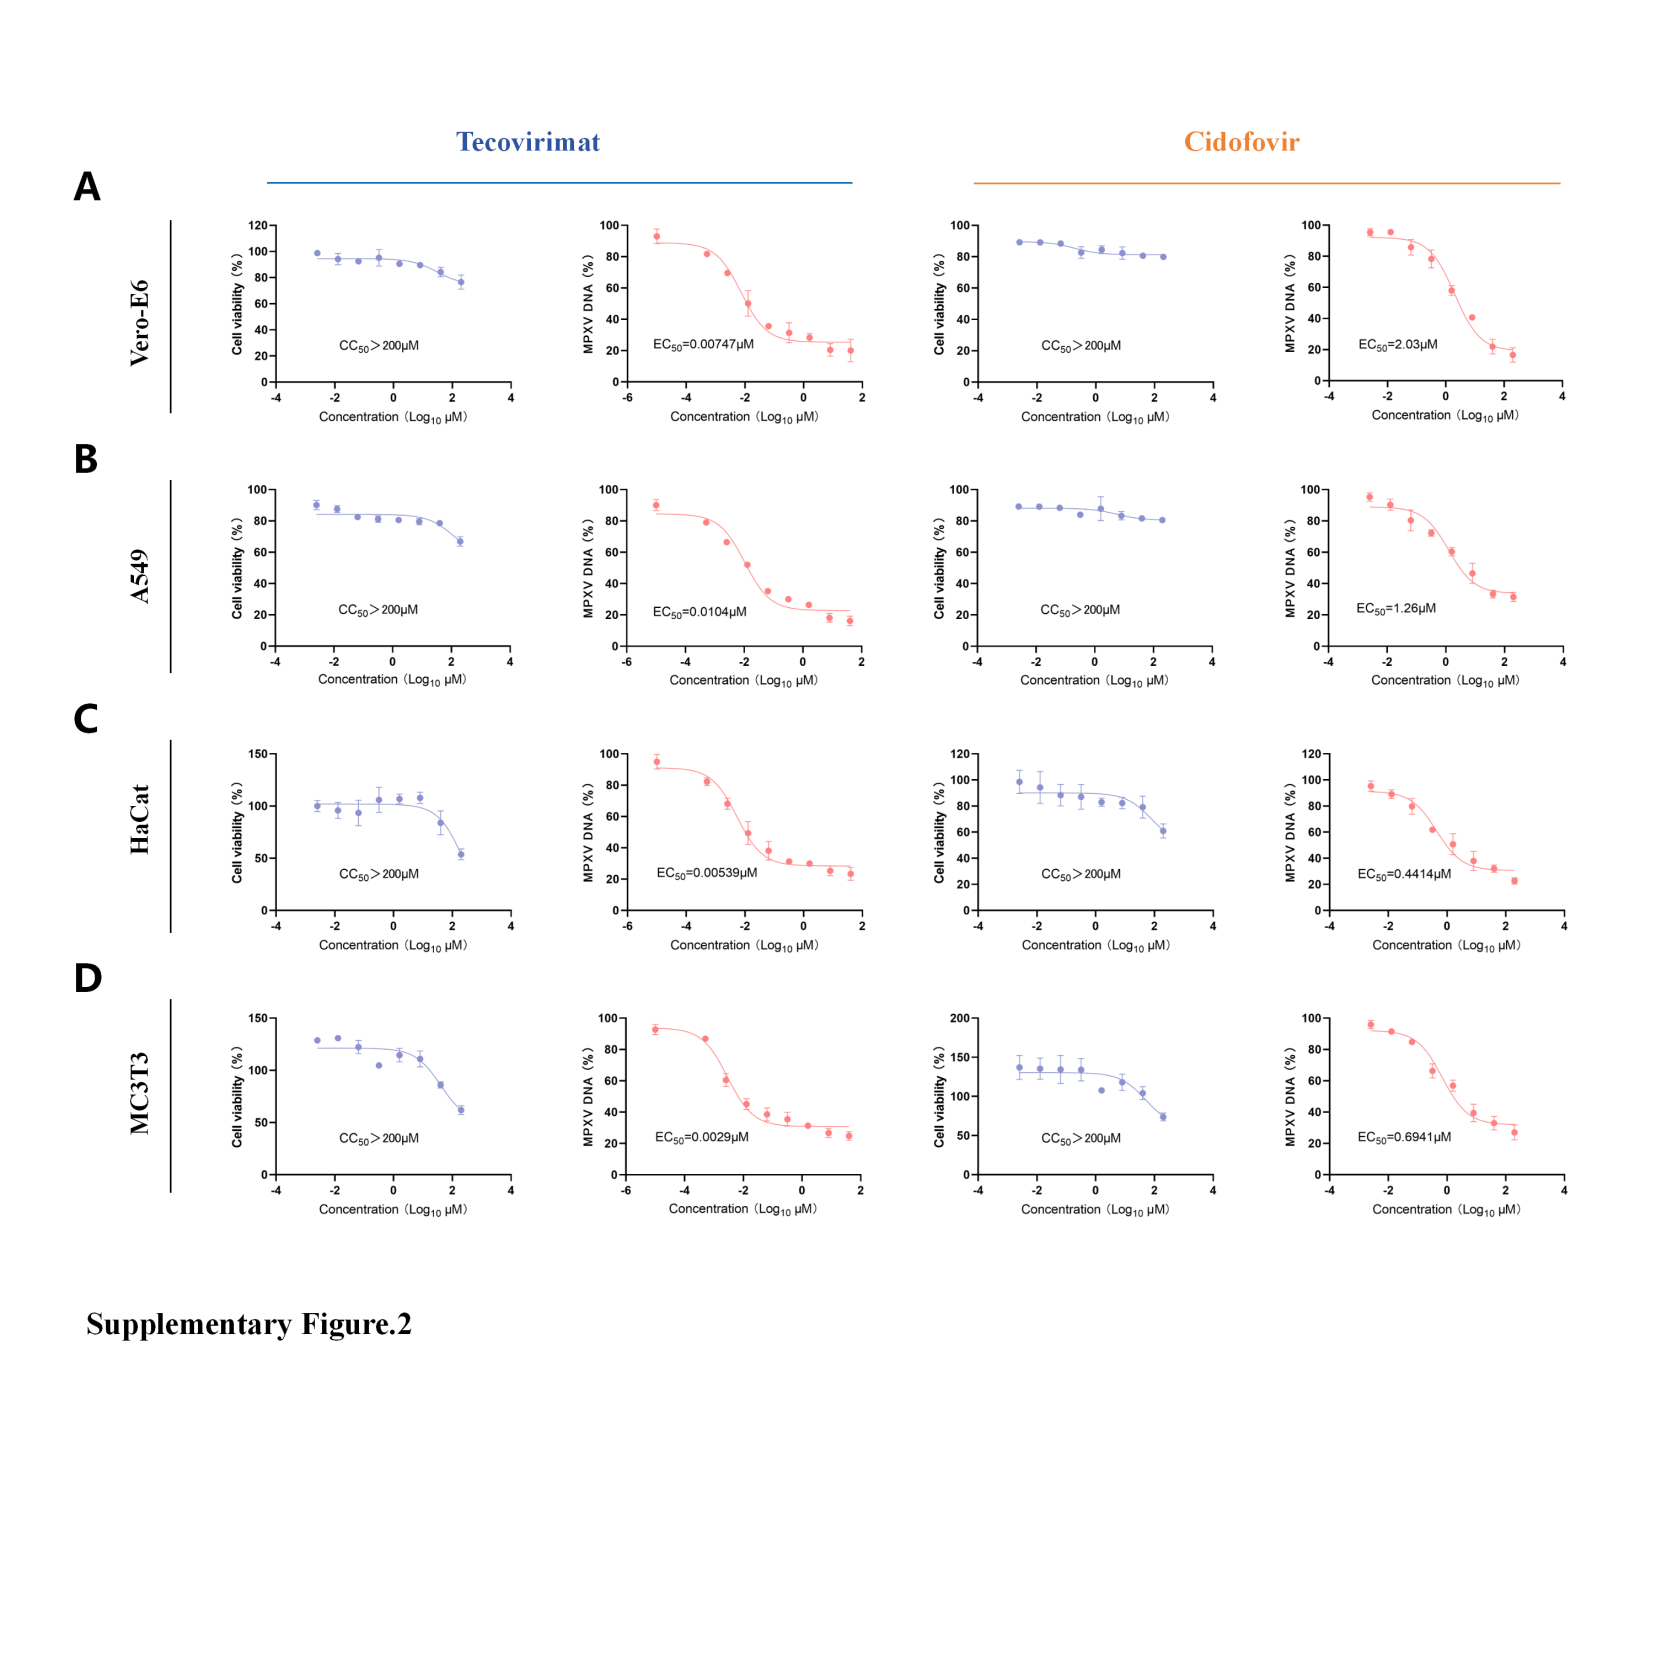


****Supplementary Figure 2.** *In vitro* Therapeutic Effects of Tecovirimat and Cidofovir.**
CC50 and EC50 of tecovirimat and cidofovir were determined in Vero-E6 (A), A549 (B), HaCaT (C), and RD cells (D). The values were determined by fitting a four-parameter logistic curve and performing nonlinear regression analysis.


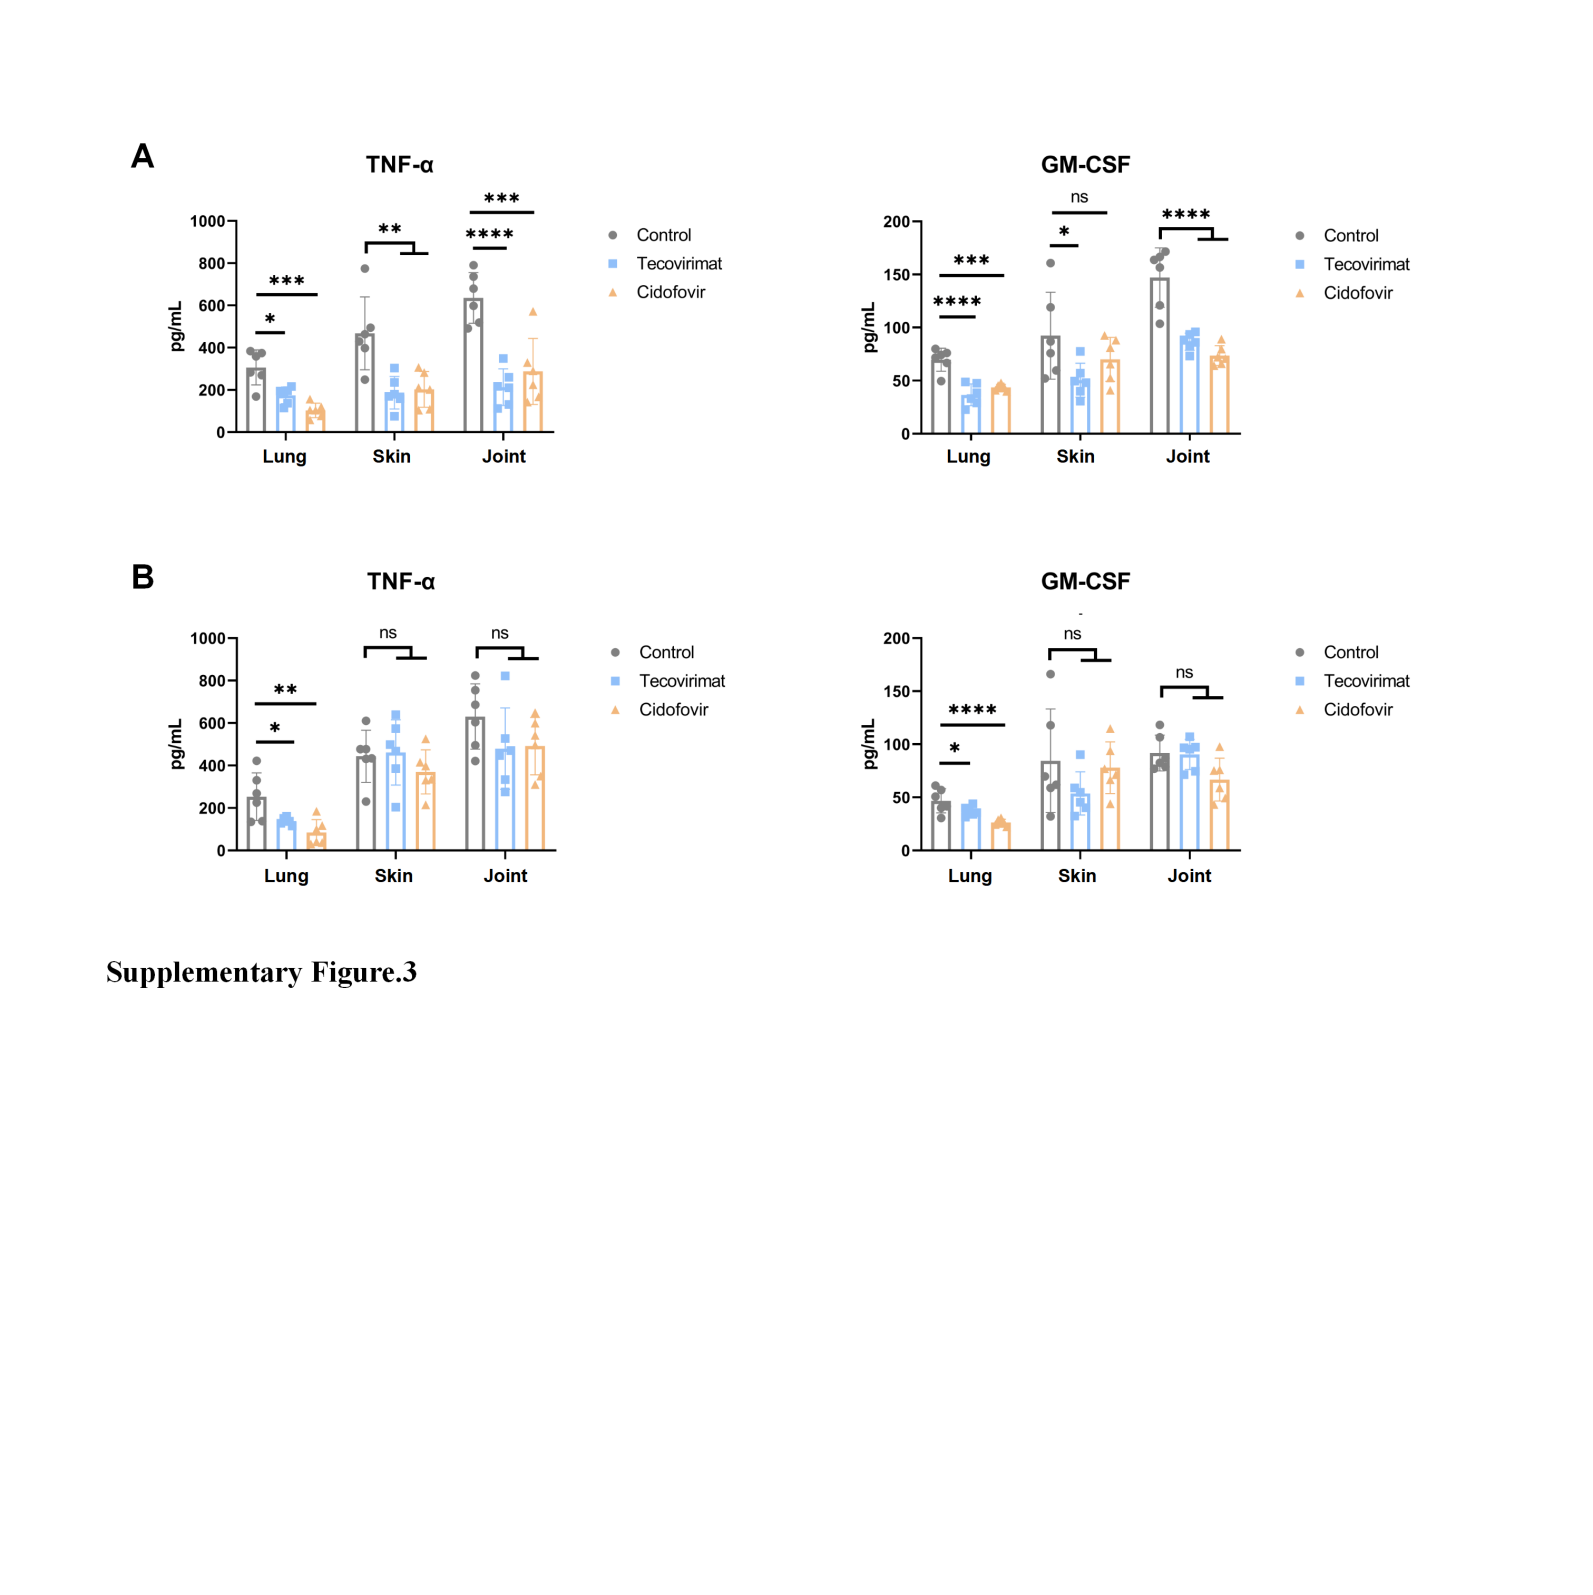


****Supplementary Figure 3.** Effects of Tecovirimat and Cidofovir Treatment on Cytokines.**
The effects of tecovirimat and cidofovir treatment on the protein expression of TNF-α and GM-CSF were measured in the intranasal, intradermal, and subcutaneous infection models. (A) Detection of TNF-α and GM-CSF at 14 dpi. (B) Detection of TNF-α and GM-CSF at 28 dpi. Error bars represent the mean ± standard error of the mean (SEM). Statistical differences between groups were determined by one-way analysis of variance (ANOVA) followed by two-tailed *t*-tests. Statistical significance levels are indicated as follows: *ns*, *P* > 0.05; **P* ≤ 0.05; ***P* ≤ 0.01; ****P* ≤ 0.001; *****P* ≤ 0.0001.

****
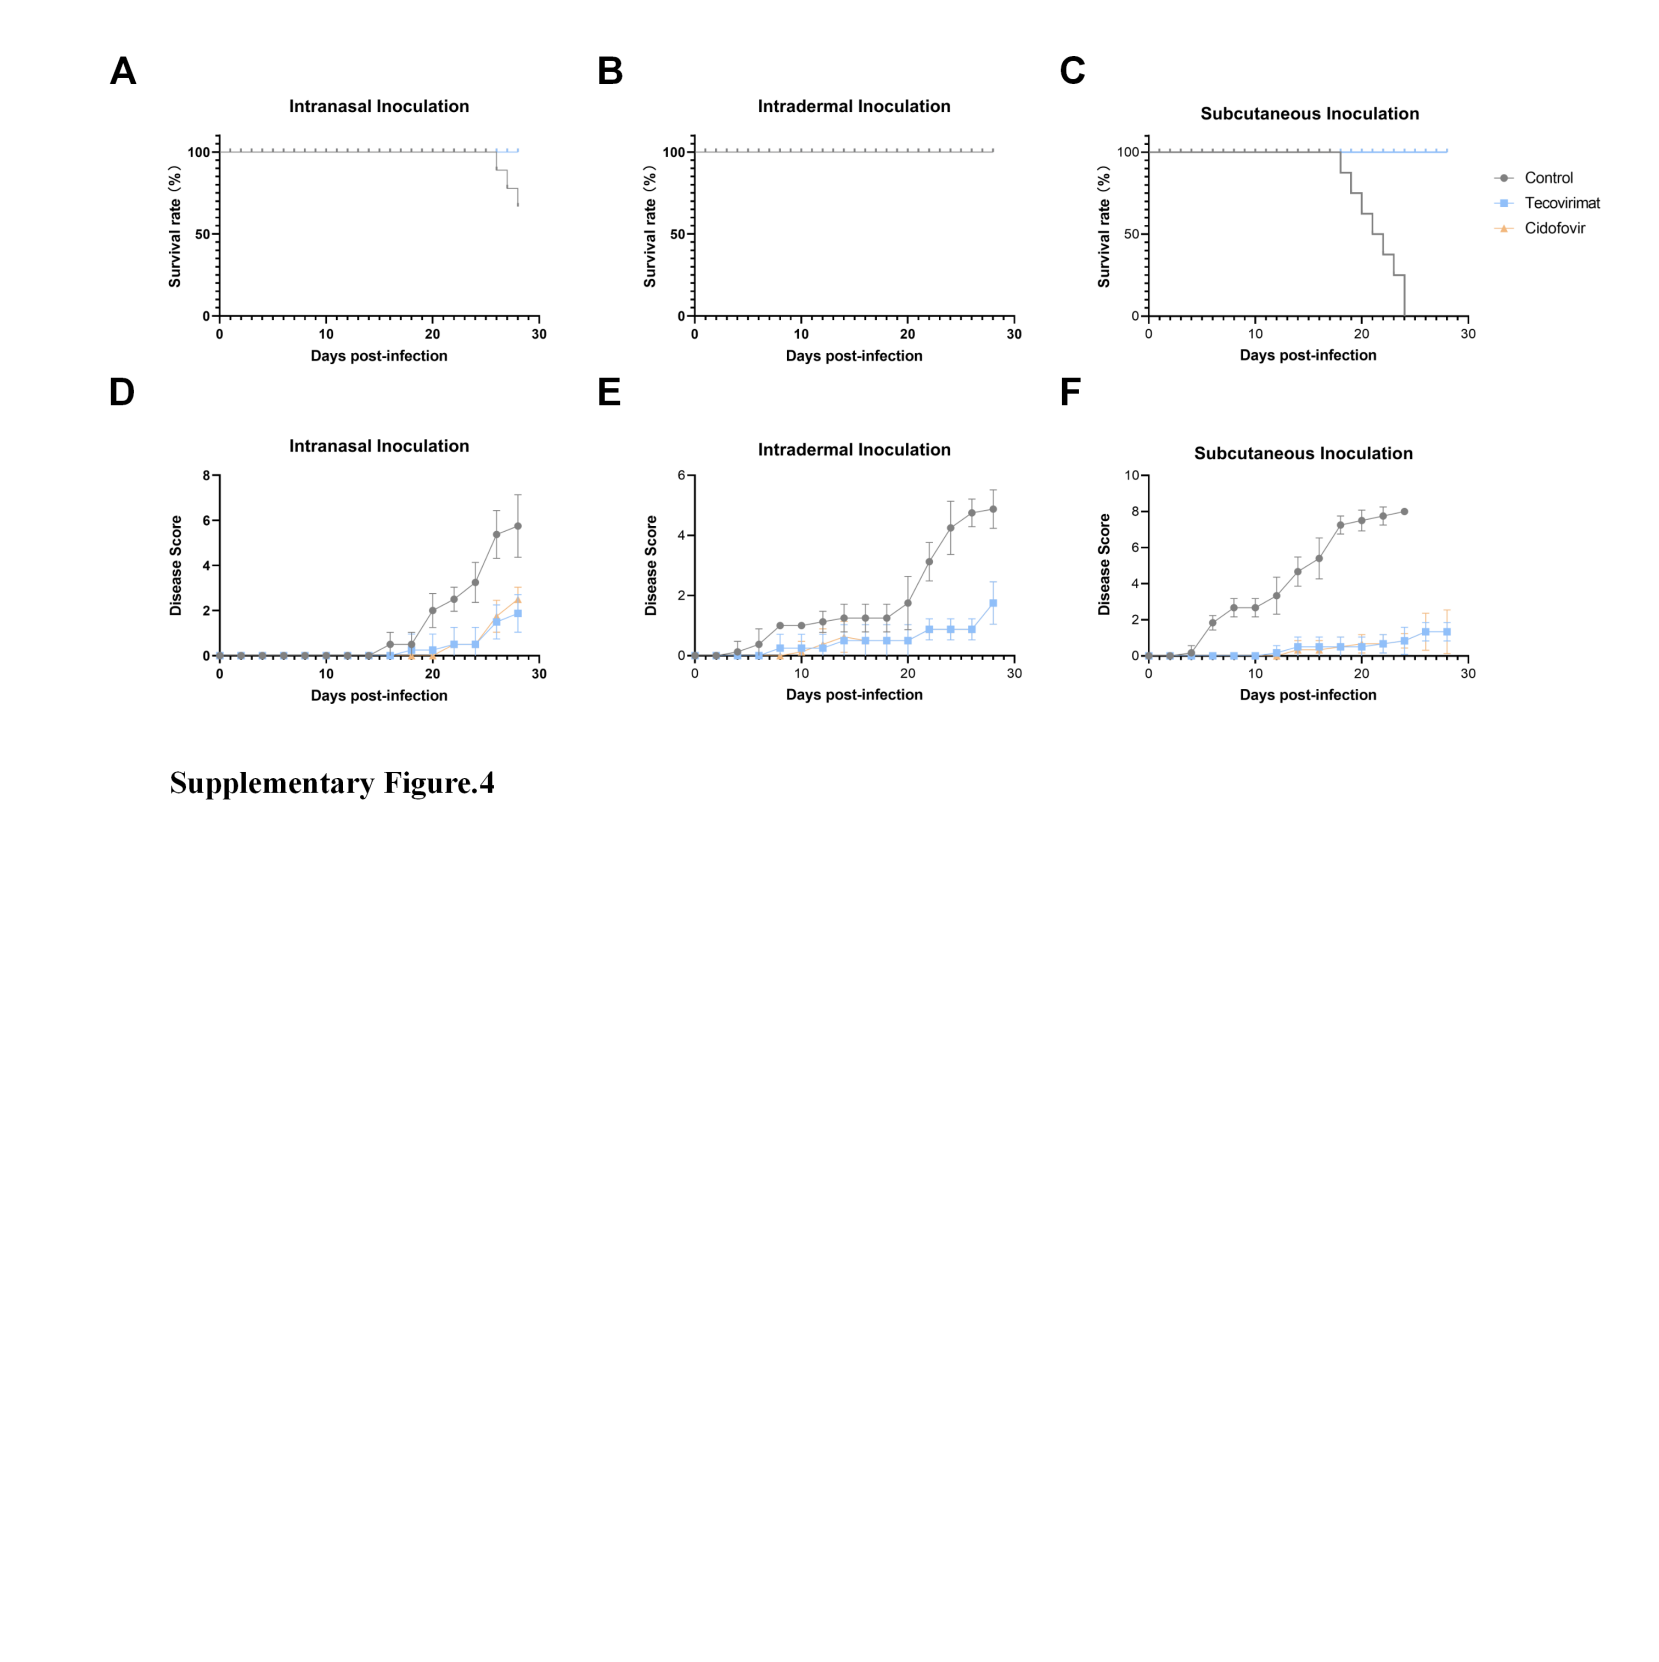
****

****Supplementary Figure 4.** Effects of Tecovirimat and Cidofovir Treatment on Survival and Disease Progression.**
(A, B, C) Survival rates and (D, E, F) disease scores of SCID mice were monitored and recorded from 0 to 28 dpi, which is treated with tecovirimat and cidofovir in the intranasal (n = 8), intradermal (n = 8), and subcutaneous (n = 8) infection models.
